# Supplementary material
Source: PubMed Central journal article supplement (PMC4296175)
Supplement: supp_cwu077_cwu077supp.pdf [file supp_cwu077_cwu077supp.pdf]

# Toward a Robust Computational Screening Strategy for Identifying Glycosaminoglycan Sequences that Display High Specificity for Target Proteins

*Nehru Viji Sankaranarayanan and Umesh R. Desai\**

Department of Medicinal Chemistry and Institute for Structural Biology and Drug Discovery  
Virginia Commonwealth University, Richmond, VA 23219

\*Address for correspondence: Dr. Umesh R. Desai, 800 E. Leigh Street, Suite 212, Richmond, VA 23219.  
Ph (804) 828-7328; Fax (804) 827-3664; [urdesai@vcu.edu](mailto:urdesai@vcu.edu)

## **SUPPLEMENTARY MATERIAL**

| <b>Table of contents</b>                                                                                                                | <b>Page</b> |
|-----------------------------------------------------------------------------------------------------------------------------------------|-------------|
| <b>Table S1:</b> H/HS hexasaccharide sequences used for algorithm optimization procedure                                                | S2          |
| <b>Table S2:</b> H/HS tetrasaccharide sequences from two libraries of 1,444 sequences each that satisfied the dual filter CVLS strategy | S3          |
| <b>Table S3:</b> H/HS disaccharide sequences from two libraries of 38 sequences each that satisfied the CVLS strategy                   | S4          |
| <b>Figure S1:</b> CVLS predicted tetrasaccharide sequences                                                                              | S5          |
| <b>Figure S2:</b> CVLS predicted octasaccharide sequences                                                                               | S6          |

**Table S1.** H/HS hexasaccharide sequences used for algorithm optimization procedure.

( $G_{DEF}$ ,  $G_{EFG}$  and  $G_{FGH}$  hexasaccharide sequences contain DEF, EFG and FGH structures, respectively, of the DEFGH pentasaccharide;  $G_{USU}$  sequences contain fewer sulfate group in comparison to  $G_{DEF}$ , while  $G_{SSS}$  sequences contain more sulfate groups.)

| Hexasaccharide sequences              |                                   | No. of $OSO_3^-$ | Hexasaccharide sequences              |                                    | No. of $OSO_3^-$ |
|---------------------------------------|-----------------------------------|------------------|---------------------------------------|------------------------------------|------------------|
| <b>The <math>G_{DEF}</math> group</b> |                                   |                  |                                       |                                    |                  |
| 1                                     | ua2A-YbC6A-ZbB-Yb236A-uc2A-YbH36A | 8                | 33                                    | ucA-YbCA-ZbB-Yb236A-uc2A-Yb26A     | 6                |
| 2                                     | uaA-YbC6A-ZbB-Yb236A-uaA-Yb23A    | 5                | 34                                    | Zb2B-Yb2A-uaA-Yb236A-uc2A-Yb26A    | 8                |
| 3                                     | uaA-YbC6A-ZbB-Yb236A-ZbB-YbCA     | 4                | 35                                    | ZbB-Yb23A-ucA-Yb236A-uc2A-Yb26A    | 8                |
| 4                                     | uc2A-YbC6A-ZbB-Yb236A-ucA-YbC6A   | 6                | 36                                    | ZbB-Yb2A-ZbB-Yb236A-uc2A-Yb26A     | 7                |
| 5                                     | ucA-YbC6A-ZbB-Yb236A-uc2A-Yb26A   | 7                | 37                                    | ua2A-Yb23A-uaA-Yb236A-uc2A-Yb26A   | 9                |
| 6                                     | ZbB-YbC6A-ZbB-Yb236A-ua2A-YbCA    | 5                | 38                                    | ua2A-Yb2A-ucA-Yb236A-uc2A-Yb26A    | 8                |
| 7                                     | ua2A-Yb26A-ZbB-Yb236A-ua2A-Yb23A  | 9                | 39                                    | ua2A-YbCA-ZbB-Yb236A-uc2A-Yb26A    | 7                |
| 8                                     | ua2A-Yb26A-ZbB-Yb236A-Zb2B-Yb23A  | 9                | 40                                    | uaA-Yb236A-uaA-Yb236A-uc2A-Yb26A   | 9                |
| 9                                     | uaA-Yb26A-ZbB-Yb236A-uc2A-YbC6A   | 7                | 41                                    | uaA-Yb26A-ucA-Yb236A-uc2A-Yb26A    | 8                |
| 10                                    | uc2A-Yb26A-ZbB-Yb236A-ua2A-YbH3A  | 8                | 42                                    | uaA-YbC6A-ZbB-Yb236A-uc2A-Yb26A    | 7                |
| 11                                    | uc2A-Yb26A-ZbB-Yb236A-ZbB-Yb2A    | 7                | 43                                    | uc2A-Yb26A-uaA-Yb236A-uc2A-Yb26A   | 9                |
| 12                                    | ucA-Yb26A-ZbB-Yb236A-ucA-Yb26A    | 7                | 44                                    | uc2A-YbC6A-ucA-Yb236A-uc2A-Yb26A   | 8                |
| 13                                    | Zb2B-Yb26A-ZbB-Yb236A-uaA-YbCA    | 6                | 45                                    | uc2A-YbH36A-ZbB-Yb236A-uc2A-Yb26A  | 9                |
| 14                                    | ZbB-Yb26A-ZbB-Yb236A-ua2A-Yb2A    | 7                | <b>The <math>G_{USU}</math> group</b> |                                    |                  |
| 15                                    | ZbB-Yb26A-ZbB-Yb236A-Zb2B-Yb2A    | 7                | 46                                    | ZbB-YbCA-ZbB-Yb2A-uc2A-YbH36A      | 4                |
| <b>The <math>G_{EFG}</math> group</b> |                                   |                  |                                       |                                    |                  |
| 16                                    | ucA-Yb23A-ZbB-Yb236A-uc2A-YbH3A   | 7                | 47                                    | ZbB-YbHA-ZbB-YbHA-ZbB-YbHA         | 0                |
| 17                                    | ucA-YbC6A-ZbB-Yb236A-uc2A-Yb2A    | 6                | 48                                    | ZbB-YbHA-ZbB-YbHA-ZbB-YbC6A        | 1                |
| 18                                    | Zb2B-Yb23A-ZbB-Yb236A-uc2A-YbH36A | 9                | 49                                    | ZbB-YbHA-ZbB-YbCA-ZbB-YbHA         | 0                |
| 19                                    | ZbB-Yb236A-ZbB-Yb236A-uc2A-Yb26A  | 9                | 50                                    | ZbB-YbHA-ZbB-YbC6A-ZbB-YbHA        | 0                |
| 20                                    | ZbB-Yb26A-ZbB-Yb236A-uc2A-YbCA    | 6                | 51                                    | ZbB-YbHA-ZbB-Yb2A-ZbB-YbHA         | 1                |
| 21                                    | ZbB-YbCA-ZbB-Yb236A-uc2A-Yb23A    | 6                | 52                                    | ZbB-YbCA-ZbB-YbHA-ZbB-YbHA         | 0                |
| 22                                    | ua2A-Yb23A-ZbB-Yb236A-uc2A-Yb23A  | 9                | 53                                    | ZbB-YbCA-ZbB-YbCA-ZbB-Yb236A       | 3                |
| 23                                    | ua2A-Yb2A-ZbB-Yb236A-uc2A-YbC6A   | 7                | 54                                    | ZbB-YbCA-ZbB-YbC6A-Zb2B-Yb26A      | 4                |
| 24                                    | ua2A-YbCA-ZbB-Yb236A-uc2A-YbH3A   | 6                | 55                                    | ZbB-YbCA-ZbB-YbC6A-ZbB-Yb26A       | 3                |
| 25                                    | uaA-Yb236A-ZbB-Yb236A-uc2A-Yb2A   | 8                | <b>The <math>G_{SSS}</math> group</b> |                                    |                  |
| 26                                    | uaA-Yb26A-ZbB-Yb236A-uc2A-YbH36A  | 8                | 56                                    | uc2A-YbH36A-uc2A-YbC6A-ZbB-Yb236A  | 8                |
| 27                                    | uaA-YbCA-ZbB-Yb236A-uc2A-Yb26A    | 6                | 57                                    | ZbB-Yb236A-ZbB-Yb236A-ua2A-Yb23A   | 9                |
| 28                                    | uc2A-Yb26A-ZbB-Yb236A-uc2A-YbCA   | 7                | 58                                    | ZbB-Yb236A-Zb2B-Yb2A-uaA-YbCA      | 5                |
| 29                                    | uc2A-YbCA-ZbB-Yb236A-uc2A-Yb23A   | 7                | 59                                    | ZbB-Yb236A-Zb2B-Yb26A-ZbB-Yb236A   | 9                |
| 30                                    | uc2A-YbH3A-ZbB-Yb236A-uc2A-YbC6A  | 7                | 60                                    | ZbB-Yb236A-ucA-Yb236A-ZbB-Yb236A   | 9                |
| <b>The <math>G_{FGH}</math> group</b> |                                   |                  |                                       |                                    |                  |
| 31                                    | ucA-Yb23A-uaA-Yb236A-uc2A-Yb26A   | 8                | 61                                    | ZbB-Yb236A-ucA-Yb236A-uc2A-YbH36A  | 9                |
| 32                                    | ucA-Yb2A-ucA-Yb236A-uc2A-Yb26A    | 7                | 62                                    | ZbB-Yb236A-uc2A-YbH36A-ua2A-YbH36A | 9                |
|                                       |                                   |                  | 63                                    | Zb2B-Yb26A-uc2A-Yb26A-Zb2B-Yb26A   | 9                |
|                                       |                                   |                  | 64                                    | Zb2B-Yb23A-uc2A-Yb26A-Zb2B-Yb23A   | 9                |
|                                       |                                   |                  | 65                                    | ucA-YbC6A-ZbB-Yb2A-uaA-Yb236A      | 5                |

**Table S2.** H/HS tetrasaccharide sequences from two libraries of 1,444 sequences each that satisfied the dual filter CVLS strategy.

| #                                 | Tetrasaccharide Sequence <sup>a</sup> | GoldScore <sup>b</sup> | # of H-bonds <sup>c</sup> |
|-----------------------------------|---------------------------------------|------------------------|---------------------------|
| <b>UA<sub>NRE</sub> Library</b>   |                                       |                        |                           |
| 1                                 | uc2A-Yb236A-ZbB-Yb23A                 | 110.49                 | 11                        |
| 2                                 | ua2A-Yb26A-Zb2B-Yb23A                 | 110.32                 | 9                         |
| 3                                 | uaA-Yb26A-Zb2B-Yb23A                  | 110.10                 | 9                         |
| 4                                 | ucA-Yb26A-Zb2B-Yb23A                  | 107.53                 | 10                        |
| 5                                 | ua2A-YbC6A-ZbB-Yb236A                 | 107.14                 | 10                        |
| 6                                 | uc2A-Yb26A-Zb2B-Yb23A                 | 106.26                 | 11                        |
| 7                                 | uc2A-YbC6A-ZbB-Yb23A                  | 103.92                 | 12                        |
| 8                                 | ua2A-YbC6A-Zb2B-Yb23A                 | 103.76                 | 10                        |
| 9                                 | ucA-YbC6A-Zb2B-Yb23A                  | 103.60                 | 10                        |
| 10                                | ucA-YbC6A-ZbB-Yb23A                   | 103.15                 | 11                        |
| 11                                | ua2A-YbH36A-ZbB-Yb236A                | 101.79                 | 8                         |
| 12                                | uc2A-YbH36A-ucA-Yb26A                 | 101.03                 | 13                        |
| 13                                | ZbB-Yb236A-ZbB-Yb236A                 | 100.96                 | 10                        |
| 14                                | ZbB-Yb26A-ZbB-Yb236A                  | 100.16                 | 11                        |
| <b>GlcN<sub>NRE</sub> Library</b> |                                       |                        |                           |
| 1                                 | Yb26A-ZbB-Yb23A-ZbB                   | 116.96                 | 12                        |
| 2                                 | Yb26A-ZbB-Yb236A-ZbB                  | 110.41                 | 11                        |
| 3                                 | YbC6A-ZbB-Yb23A-Zb2B                  | 110.40                 | 11                        |
| 4                                 | YbC6A-ZbB-Yb236A-ucA                  | 109.82                 | 14                        |
| 5                                 | YbC6A-ZbB-Yb236A-uc2A                 | 108.51                 | 11                        |
| 6                                 | YbC6A-ZbB-Yb236A-ZbB                  | 107.56                 | 10                        |
| 7                                 | Yb26A-ZbB-Yb23A-ucA                   | 106.62                 | 16                        |
| 8                                 | Yb2A-ZbB-Yb23A-uc2A                   | 105.39                 | 10                        |
| 9                                 | Yb26A-ZbB-YbH3A-uc2A                  | 104.26                 | 10                        |
| 10                                | Yb2A-Zb2B-Yb236A-uc2A                 | 103.75                 | 9                         |
| 11                                | Yb23A-ZbB-Yb23A-uc2A                  | 103.41                 | 10                        |
| 12                                | Yb23A-ZbB-Yb23A-ucA                   | 103.01                 | 12                        |
| 13                                | Yb23A-Zb2B-Yb236A-uc2A                | 102.62                 | 12                        |
| 14                                | Yb26A-Zb2B-Yb236A-ZbB                 | 99.28                  | 11                        |
| 15                                | YbC6A-ZbB-Yb23A-uc2A                  | 98.38                  | 11                        |
| 16                                | YbCA-ZbB-Yb23A-uc2A                   | 97.68                  | 9                         |

<sup>a</sup>See definitions of residue labels and substitution in Table 1. <sup>b</sup>Refers to modified GoldScore, as defined in the Methods section. <sup>c</sup>Number of hydrogen bonds calculated using LIGPLOT.

**Table S3.** H/HS disaccharide sequences from two libraries of 38 sequences each that satisfied the CVLS strategy.

| #                                 | Disaccharide Sequence <sup>a</sup> | Gold Score <sup>b</sup> | # of H-bonds <sup>c</sup> |
|-----------------------------------|------------------------------------|-------------------------|---------------------------|
| <b>GlcN<sub>NRE</sub> Library</b> |                                    |                         |                           |
|                                   | None                               |                         |                           |
| <b>UA<sub>NRE</sub> Library</b>   |                                    |                         |                           |
| 1                                 | Zb2B-Yb23A                         | 71.18                   | 8                         |
| 2                                 | ZbB-Yb236A                         | 67.22                   | 7                         |
| 3                                 | ZbB-Yb23A                          | 68.58                   | 8                         |

<sup>a</sup>See definitions of residue labels and substitution in Table 1. <sup>b</sup>Refers to modified GoldScore, as defined in the Methods section. <sup>c</sup>Number of hydrogen bonds calculated using LIGPLOT.

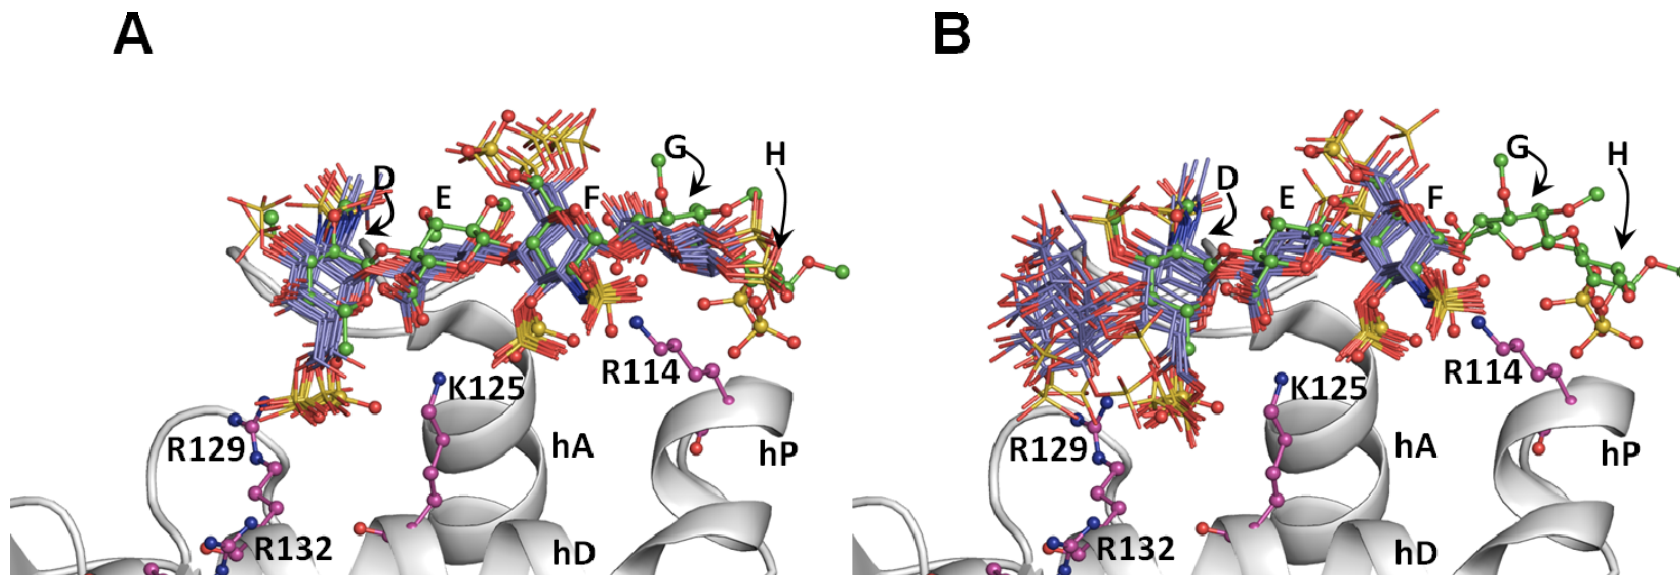

**Figure S1.** CVLS predicted tetrasaccharide sequences from the GlcN<sub>NRE</sub> (A) and UA<sub>NRE</sub> libraries (B) containing 1,444 sequences each. Shown are overlays of the docked poses of tetrasaccharide sequences that bind AT with ‘high specificity’ by satisfying the dual filter strategy. A) shows 16 sequences (blue sticks) from the GlcN<sub>NRE</sub> library and B) shows 14 sequences (blue sticks) from UA<sub>NRE</sub> tetrasaccharide library. Helices A (hA), D (hD) and P (hP) of antithrombin are shown in ribbon form and residues Arg132, Arg129, Lys125 and Arg114 are shown in ball and stick display. The crystal structure of DEFGH in green ball and sticks display is shown to highlight correspondence with the CVLS predicted poses.

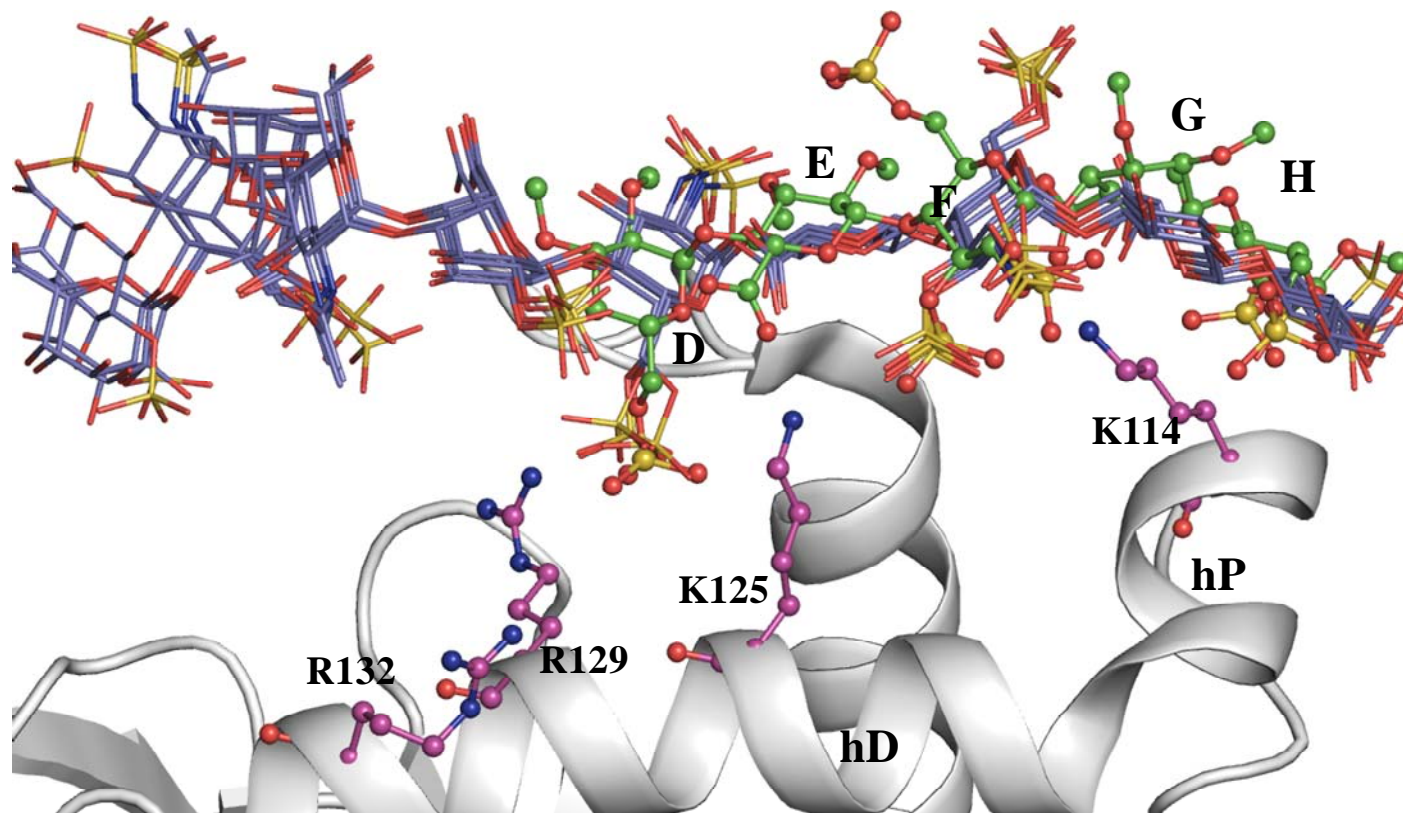

**Figure S2.** CVLS predicted octasaccharide sequences from the  $UA_{NRE}$ . Six sequences satisfied the CVLS dual filter criteria. Helices A (hA), D (hD) and P (hP) of antithrombin are shown in ribbon form and residues Arg132, Arg129, Lys125 and Arg114 are shown in ball and stick display. The crystal structure of DEFGH in green ball and sticks display is shown to highlight correspondence with the CVLS predicted poses.
